# Supplementary material
Source: PubMed Central journal article supplement (PMC4899171)
Supplement: NIHMS778525-supplement-supp_tables1-2.pdf [file NIHMS778525-supplement-supp_tables1-2.pdf]

**Supplementary Table 1:** Regions exhibiting DNA modification levels that are significantly associated with *LCT* mRNA levels in development and adulthood

| <b>Chromosome-wide investigation</b>     |                               |                |                                                |                                                                            |
|------------------------------------------|-------------------------------|----------------|------------------------------------------------|----------------------------------------------------------------------------|
| <b>Locus</b>                             | <b>Region*</b>                | <b>Species</b> | <b>−log<sub>10</sub>(<i>q</i>)<sup>†</sup></b> | <b>Association</b>                                                         |
| <i>LCT</i> exon–intron 1                 | chr2: 136,594,004–136,594,148 | Human          | 1.78                                           | ↑5-mC = ↓ <i>LCT</i> mRNA                                                  |
| <i>Lct</i> exon 10                       | chr1: 128,295,240–128,295,278 | Mouse          | 2.14                                           | ↑5-mC with ↑age                                                            |
| <i>Lct</i> intron 8–exon 9               | chr1: 128,298,461–128,298,810 | Mouse          | 3.05                                           | ↑5-mC with ↑age                                                            |
| <i>Lct</i> intron 2–exon 3               | chr1: 128,312,912–128,313,561 | Mouse          | 3.20                                           | ↑5-mC with ↑age                                                            |
| <b>Fine-mapping investigation: Human</b> |                               |                |                                                |                                                                            |
| <b>Locus</b>                             | <b>Region*</b>                |                | <b>−log<sub>10</sub>(<i>p</i>)<sup>‡</sup></b> | <b>Association</b>                                                         |
| <i>LCT</i> intron 5 (LncRNA promoter)    | chr2: 136,577,792–136,578,051 |                | 10.10                                          | Cell-type specific; ↑5-mC = ↑ <i>LCT</i> mRNA                              |
| <i>LCT</i> intron 3                      | chr2: 136,583,097–136,583,652 |                | 5.33                                           | Cell-type specific; ↑5-mC = ↓ <i>LCT</i> mRNA                              |
| <i>LCT</i> intron 2                      | chr2: 136,589,129–136,589,405 |                | 11.48                                          | Cell-type specific; ↑5-mC = ↓ <i>LCT</i> mRNA                              |
| <i>LCT</i> exon 1                        | chr2: 136,594,396–136,594,421 |                | 10.56                                          | Cell-type specific; ↑5-mC = ↓ <i>LCT</i> mRNA                              |
| <i>MCM6</i> exon 17 (3'-UTR)             | chr2: 136,597,453–136,597,614 |                | 4.07                                           | Cell-type specific; ↑5-mC = ↓ <i>LCT</i> mRNA                              |
| <i>MCM6</i> exon 16                      | chr2: 136,602,097–136,602,294 |                | 4.27                                           | Inter-individual variation & Cell-type specific; ↑5-mC = ↓ <i>LCT</i> mRNA |
| <i>MCM6</i> intron 13–exon 13            | chr2: 136,608,430–136,609,013 |                | 10.96                                          | Inter-individual variation & Cell-type specific; ↑5-mC = ↓ <i>LCT</i> mRNA |
|                                          |                               |                | 2.42                                           | ↑5-mC = ↓ <i>LCT</i> mRNA                                                  |

**Fine-mapping investigation: Mouse**

| <b>Locus</b>        | <b>Region*</b>    |  | <b>−log<sub>10</sub>(<i>p</i>)<sup>§</sup></b> | <b>Association</b> |
|---------------------|-------------------|--|------------------------------------------------|--------------------|
| <i>Lct</i> intron 8 | chr1: 128,298,854 |  | 3.51                                           | ↑5-mC with ↑age    |
| <i>Lct</i> intron 2 | chr1: 128,313,221 |  | 3.81                                           | ↑5-mC with ↑age    |

\*Human regions are GRCh37/hg19, mouse regions are GRCm38/mm10; †, ‡, §Significance values correspond to the most significant site in each region; †FDR  $q < 0.05$  after Benjamini-Hochberg multiple testing correction; ‡ $p < 0.01$  after Bonferroni correction for multiple testing; §FDR  $q < 0.05$ .

**Supplementary Table 2:** Roadmap Epigenomics Project and ENCODE data sets used for chromatin accessibility and histone modification analysis

| <b>Sample code</b> | <b>Sources</b>              | <b>Tissue</b>                                 | <b>Age</b>           | <b>Sex</b> | <b>Data sets</b>                        |
|--------------------|-----------------------------|-----------------------------------------------|----------------------|------------|-----------------------------------------|
| H-23769            | Roadmap Epigenomics Project | Fetal small intestine, human                  | 108 days             | Male       | DNase I HS                              |
| H-24595            | Roadmap Epigenomics Project | Fetal small intestine, human                  | 108 days             | Male       | H3K4me1<br>H3K4me3<br>H3K27ac           |
| ENCBS157ENC        | ENCODE                      | Small intestine, mouse<br>Strain: C57BL/6NCrl | 8 weeks<br>(60 days) | Male       | POLR2A<br>H3K4me1<br>H3K4me3<br>H3K27ac |
